# Supplementary material for: Prevalence of Unrecognized Cognitive Impairment in Federally Qualified Health Centers
Source: PubMed Central journal article supplement (PMC11581540; doi:10.1001/jamanetworkopen.2024.40411), 2024-10-22
Supplement: jamanetwopen-e2440411-s001.pdf [file jamanetwopen-e2440411-s001.pdf]

## Data Sharing Statement

Kulshreshtha. Prevalence of Unrecognized Cognitive Impairment in Federally Qualified Health Centers. *JAMA Netw Open*. Published October 22, 2024.

doi:10.1001/jamanetworkopen.2024.40411

### Data

**Data available:** No

### Additional Information

**Explanation for why data not available:** Data will be made available once the full clinical trial is completed.
